# Supplementary material
Source: Royal Society of Chemistry journal article supplement (doi:10.1039/d5nj04949k)
Supplement: d5nj04949k1.pdf [file d5nj04949k1.pdf]

## SUPPLEMENTARY INFORMATION

**Table 1** – Observed  $2\theta$  diffraction peak positions of the prepared  $\alpha$  -  $\text{MoO}_3$ . These peaks confirm the orthorhombic phase formation and crystallinity of the sample and well matched with ICDD data.

**Table 1.  $2\theta$  values of the sample**

| hkl   | Standard $2\theta$ values | Prepared sample $2\theta$ |
|-------|---------------------------|---------------------------|
| (110) | 23.33                     | 23.14                     |
| (040) | 25.69                     | 25.50                     |
| (021) | 27.29                     | 27.11                     |
| (111) | 33.73                     | 33.48                     |
| (060) | 38.97                     | 38.67                     |
| (200) | 45.76                     | 45.93                     |
| (002) | 49.19                     | 49.07                     |

**Table 2** – The calculated parameters of  $\beta \cos \theta$  and  $4 \sin \theta$  which are required to W-H plot based on Williamson-Hall method. These values help separate the contributions of crystallite size broadening and lattice strain in the XRD peaks. By plotting ( $4 \sin \theta$ ) versus ( $\beta \cos \theta$ ), the slope gives the micro strain.

**Table 2. The calculated values of  $\beta \cos \theta$  and  $4 \sin \theta$  for the prepared sample**

| $2\theta$ (degree) | FWHM (deg) | $\beta \cos \theta$ | $4 \sin \theta$ |
|--------------------|------------|---------------------|-----------------|
| 23.15657           | 0.44806    | 0.007661            | 0.802827        |
| 25.47514           | 0.38931    | 0.006628            | 0.881943        |
| 27.09909           | 0.36369    | 0.006171            | 0.937144        |
| 33.40937           | 0.57868    | 0.009674            | 1.149755        |
| 38.66673           | 0.64265    | 0.010584            | 1.324256        |
| 45.80725           | 0.75122    | 0.012078            | 1.556729        |
| 48.99383           | 0.44136    | 0.00701             | 1.658577        |
